# Supplementary material for: The Measurement of Love: Psychometric Properties and Preliminary Findings of the Short Love Scale (SLS-12) in a Polish Sample
Source: MDPI journal article supplement (doi:10.3390/ijerph192013269), 2022-10-14
Supplement: s1 [file s1]

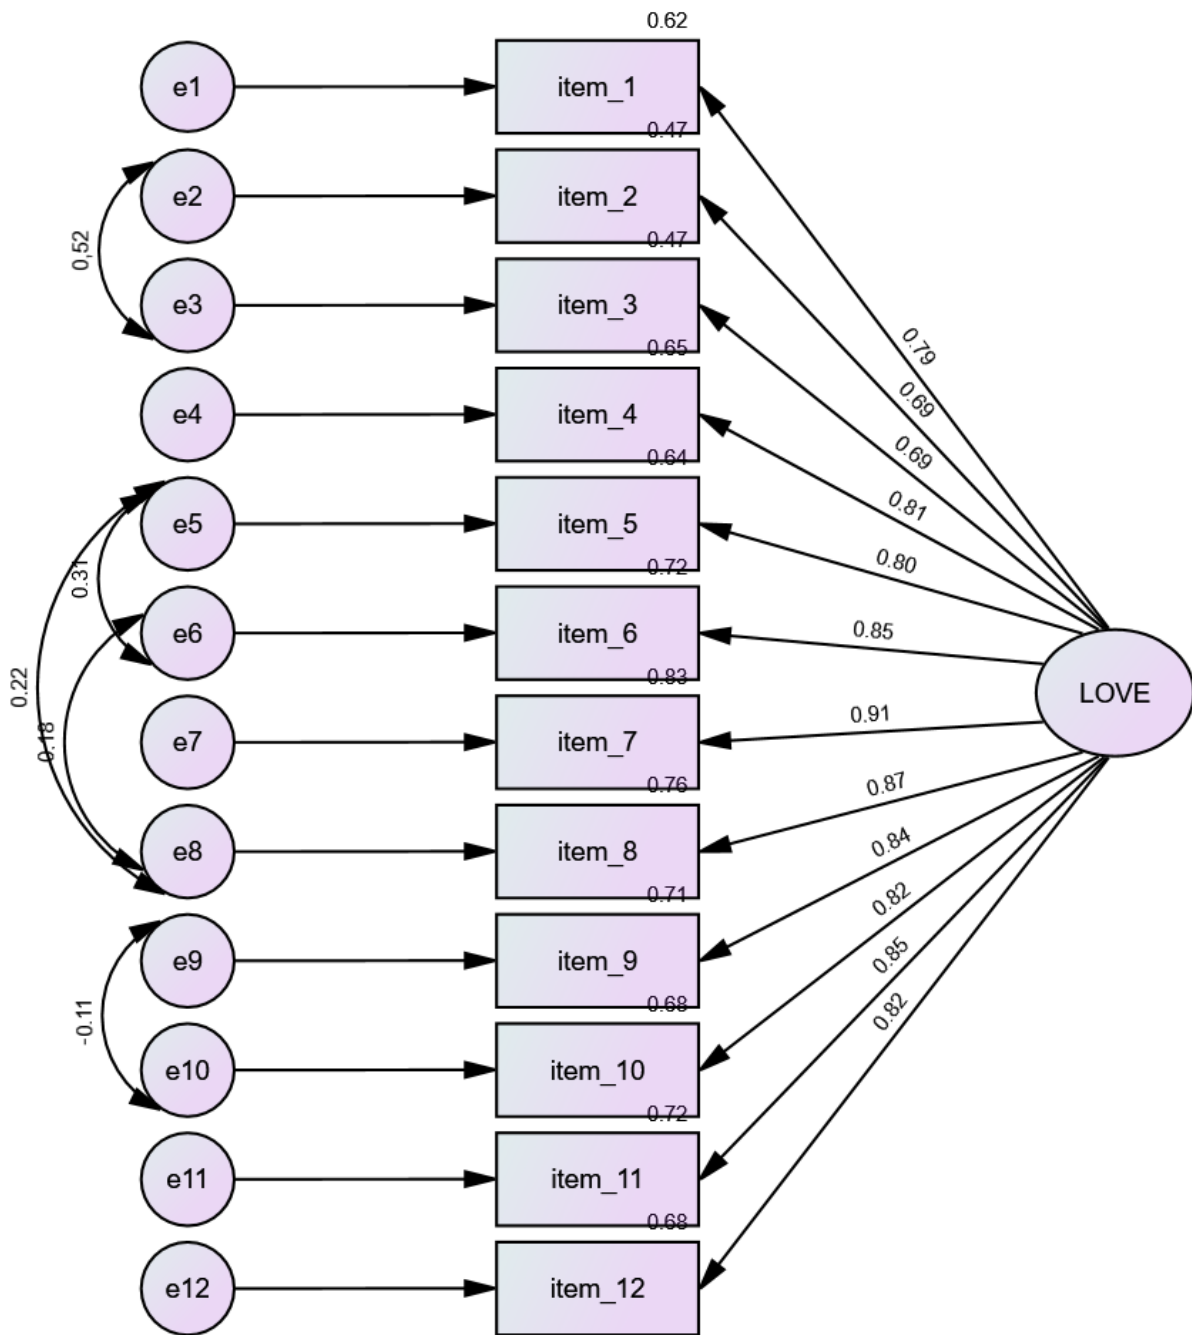

**Figure S1.** One-factor SLS-12 model based on EFA solution (n=470)

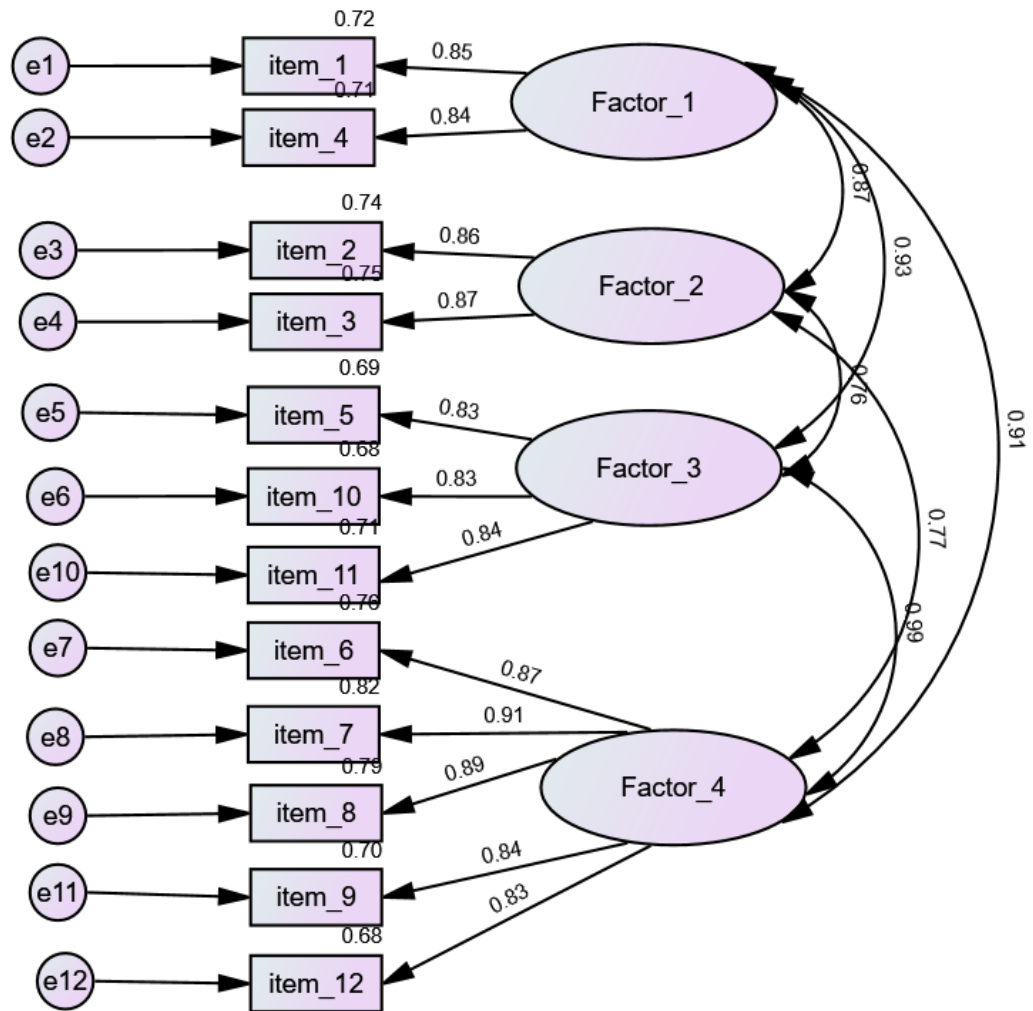

**Figure S2.** Four-factor SLS-12 model based on EFA solution (n=470)

**Table S1.** Exploratory factor analysis (EFA) of the Short Love Scale (SLS-12;  $n = 471$ ).

| Variables | Factor 1 |
|-----------|----------|
| item_1    | 0.668    |
| item_2    | 0.556    |
| item_3    | 0.540    |
| item_4    | 0.689    |
| item_5    | 0.679    |
| item_6    | 0.724    |
| item_7    | 0.809    |
| item_8    | 0.786    |
| item_9    | 0.733    |
| item_10   | 0.780    |
| item_11   | 0.727    |
| item_12   | 0.761    |

Promax with Kaiser normalization; factor loadings below 0.40 are not presented

**Table S2.** Exploratory factor analysis (EFA) of the Short Love Scale (SLS-12;  $n = 471$ ).

| Variables | Factor 1 | Factor 2 | Factor 3 |
|-----------|----------|----------|----------|
| item_1    |          | 0.804    |          |
| item_2    | 0.835    |          |          |
| item_3    | 0.895    |          |          |
| item_4    |          | 0.675    |          |
| item_5    |          |          | 0.640    |
| item_6    |          |          | 0.756    |
| item_7    |          |          | 0.614    |
| item_8    |          |          | 0.885    |
| item_9    |          |          | 0.922    |
| item_10   |          |          | 0.638    |
| item_11   |          |          | 0.490    |
| item_12   |          |          | 0.778    |

Promax with Kaiser normalization; factor loadings below 0.40 are not presented.

**Table S3.** Exploratory factor analysis (EFA) of the Short Love Scale (SLS-12;  $n = 471$ ).

| Variables | Factor 1 | Factor 2 | Factor 3 | Factor 4 |
|-----------|----------|----------|----------|----------|
| item_1    | 0.638    |          |          |          |
| item_2    |          | 0.850    |          |          |
| item_3    |          | 0.918    |          |          |
| item_4    | 0.765    |          |          |          |
| item_5    |          |          | 0.851    |          |
| item_6    |          |          |          | 0.555    |
| item_7    |          |          |          | 0.481    |
| item_8    |          |          |          | 0.647    |
| item_9    |          |          |          | 0.868    |
| item_10   |          |          | 0.484    |          |
| item_11   |          |          | 0.458    |          |
| item_12   |          |          |          | 0.757    |

Promax with Kaiser normalization; factor loadings below 0.40 are not presented
